# Supplementary material for: Heterologous Expression of CLIBASIA_03915/CLIBASIA_04250 by Tobacco Mosaic Virus Resulted in Phloem Necrosis in the Senescent Leaves of Nicotiana benthamiana
Source: PubMed Central journal article supplement (PMC7073121; doi:10.3390/ijms21041414), 2020-02-19
Supplement: ijms-21-01414-s001.pdf [file ijms-21-01414-s001.pdf]

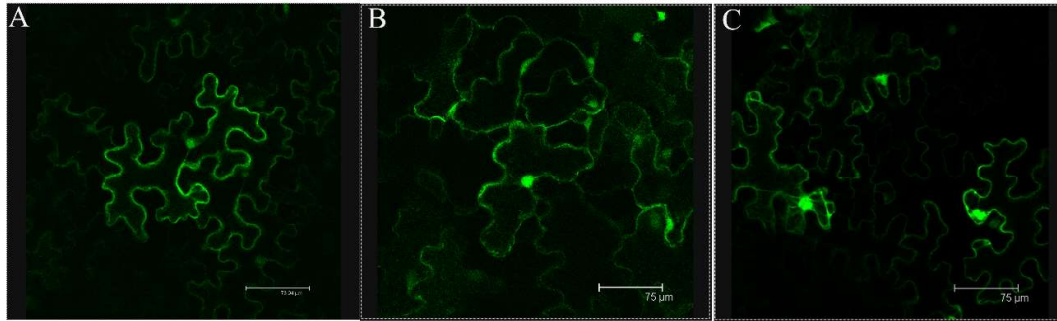

**Figure S1.** Distribution pattern of free GFP, m03915-GFP, and m04250-GFP in the epidermic cells of *N. benthamiana*. The full expanded leaves of six true leaf-stage *N. benthamiana* were used for agroinfiltration to determine the distribution patterns of free GFP, m03915-GFP, and m04250-GFP. Free GFP (A), m03915-GFP (B), and m04250-GFP showed the similar distribution pattern in the epidermic cells of *N. benthamiana*.

**Table S1.** Primers used in this research.

| <b>Primers used for <i>phoA</i> assay</b>                     |                                                  |
|---------------------------------------------------------------|--------------------------------------------------|
| <u>CLIBASIA_03915</u><br>PF                                   | <u>GAGCTCATGAATGCCAAGGGATTAATAGTAGC</u>          |
| CLIBASIA_03915<br>PR                                          | <u>CAATGTTGTTCCCTTTATTGCTATTTC</u>               |
| CLIBASIA_04250<br>PF                                          | <u>GAGCTCATGAATACAAGAATAATAGGAACCG</u>           |
| CLIBASIA_04250<br>PR                                          | <u>CAATGTCTTCTGGATTGATTTTTACC</u>                |
| Primers used for construction vectors for expression with TMV |                                                  |
| m03915 EF                                                     | <u>TTAATTAATGTGGAATCTAAAGCACGCAATTAGAAAAG</u>    |
| m03915 ER                                                     | <u>CTCGAGTTATTGTTCCCTTTATTGCTATTTC</u>           |
| m03915 NF                                                     | <u>TTAATTAATAATGGAATCTAAAGCACG</u>               |
| m04250 EF                                                     | <u>TTAATTAATGTGTTCTTCTAAAAAAGGAGGTGAAAAAAAAG</u> |
| m04250 ER                                                     | <u>CTCGAGCTATCTTCTGGATTGATTTTTACCATTTTTTC</u>    |
| m04250 NF                                                     | <u>TTAATTAATGTTCTTCTAAAAAAGGAGGTGAAAAAAAAG</u>   |
| Primers used for subcellular localization                     |                                                  |
| GFP F                                                         | <u>TCTAGAATGGCTAGCAAAGGAGAAGAAGACTTTTC</u>       |
| GFP R                                                         | <u>GAGCTCTTATTGTAAGTTCATCCATGCCATGTGT</u>        |
| GFP FF                                                        | <u>CCCGGGCTAGCAAAGGAGAAGAAGACTTTTC</u>           |
| GFP FR                                                        | <u>GAGCTCTTATTGTAAGTTCATCCATGCCATGTGT</u>        |
| m03915 GF                                                     | <u>TCTAGATGTGGAATCTAAAGCACGCAATTAG</u>           |
| m03915 GR                                                     | <u>CCCGGGTTGTTCCCTTTATTGCTATTTC</u>              |
| m04250 GF                                                     | <u>TCTAGATGTGTTCTTCTAAAAAAGGAGGTGAAAAAAAAG</u>   |
| m04250 GR                                                     | <u>CCCGGGTCTTCTGGATTGATTTTTACCATTTTTTC</u>       |

|           |                                                             |
|-----------|-------------------------------------------------------------|
| HAint F   | TCTAGATGTACCCATACGATGTTCCAGATTACGTAAGTTTCTGCTTCT<br>ACCTTTG |
| HAint R   | GAGCTCCCCGGGGGATCCAGCCTGCACATCAACAAATTTTGGTCATA<br>TATTAG   |
| RFP F     | <u>GGATCC</u> GCCTCCTCCGAGGACGTCATCAAGG                     |
| RFP R     | <u>GAGCTC</u> TAGGCGCCGGTGGAGTGGCGGCCCTC                    |
| RFP-NLS F | <u>GGATCC</u> ATGGCCTCCTCCGAGGACGTCATCAAGG                  |
| RFP-NLSR  | <u>GAGCTC</u> TCTAGATCAGGTCGATCCCCGACGCTATTTCCGAAGAATCAC    |

---

Primers used for yeast two-hybrid

|            |                                             |
|------------|---------------------------------------------|
| m03915 YF  | <u>GAATTC</u> GGAATCTAAAGCACGCAATTAG        |
| m03915 YMR | <u>GGATCC</u> TGGGCCTTTATTGCTATTTCTATCTTTC  |
| m04250 YF  | <u>GAATTC</u> TGTTCTTCTAAAAAAGGAGGTGAAAAAAG |
| m04250 YR  | <u>GGATCC</u> CTATCTTCTGGATTGATTTTTACC      |

---

Underlines indicate the added restriction enzyme sites.
